# Supplementary material for: E-selectin-targeted Sialic Acid-PEG-dexamethasone Micelles for Enhanced Anti-Inflammatory Efficacy for Acute Kidney Injury
Source: PubMed Central journal article supplement — Theranostics. 2017 Jun 1;7(8):2204–19. doi: 10.7150/thno.19571 (PMC5505054; doi:10.7150/thno.19571), 2017-06-01
Supplement: thnov07p2204s1.pdf [file thnov07p2204s1.pdf]

## Supplementary data

### **E-selectin-targeted sialic acid-PEG-dexamethasone micelles for enhanced anti-inflammatory efficacy of dexamethasone for acute kidney injury**

Supplementary methods:

Fig. S1. The hydrolysis of DXM from conjugates for HPLC analysis.

Fig. S2. Immunohistochemical analyses of E-selectin.

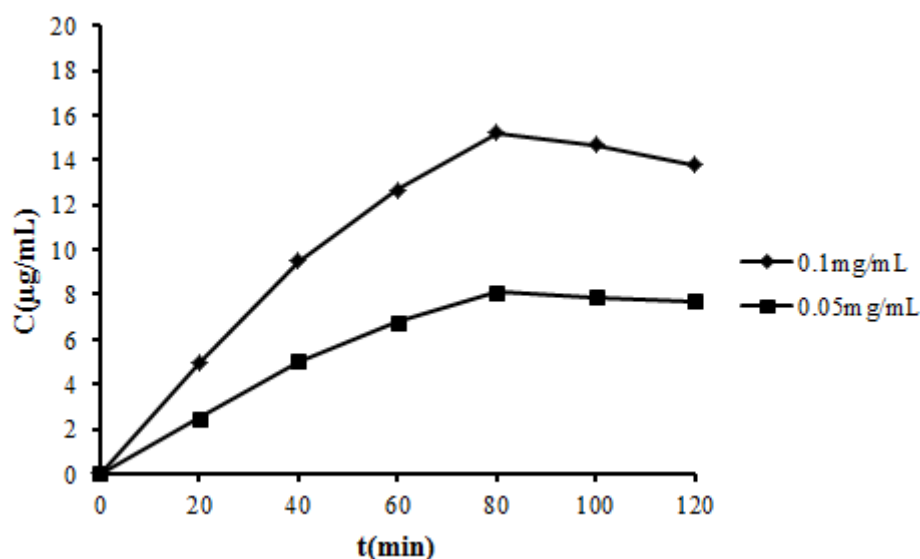

Fig. S1. The hydrolysis of DXM from conjugates for HPLC analysis. The average coupling degree of dexamethasone (DXM) to PEG was determined by measuring the amount of DXM after hydrolysis of the conjugates. 50  $\mu$ L 1M NaOH aqueous solution was added to the SA-PEG-DXM aqueous solution (0.5 mL). After 120 min hydrolysis at 37  $^{\circ}$ C, DXM was released from the SA-PEG-DXM conjugates, and then 50  $\mu$ L 1M HCl was added to neutralize NaOH.

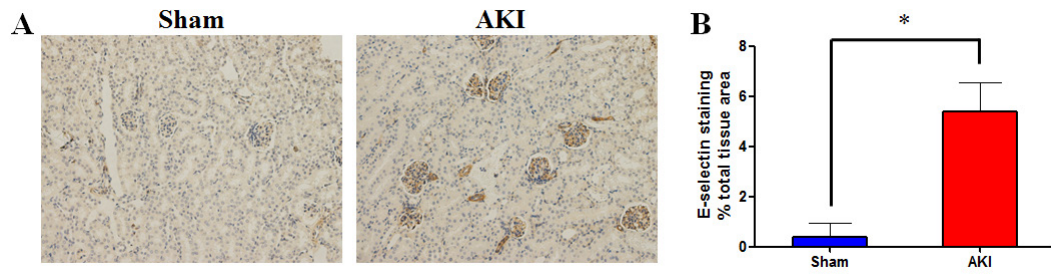

Fig. S2. Representative immunological histological chemistry of E-selectin in cortical kidney sections, including AKI murine model and negative control. (A) Renal cortex from sham and AKI murine model. (B) Quantitative evaluation of E-selectin expression.
